# Supplementary material
Source: Royal Society of Chemistry journal article supplement (doi:10.1039/d6nh00044d)
Supplement: d6nh00044d1.pdf [file d6nh00044d1.pdf]

## Supplementary Information

### **A non-van der Waals platform for deep-subwavelength twist-polaritonics based on $\beta$ -**

#### **Ga<sub>2</sub>O<sub>3</sub> nanoflakes**

Liyan Wang,<sup>a</sup> Kaijun Feng,<sup>b</sup> Shuai Liu,<sup>c</sup> Jiehui Tian,<sup>a</sup> Xiangdong Guo,<sup>b</sup> Lin Geng,<sup>c</sup> Yuchuan Xiao,<sup>d</sup> Debo Hu,<sup>\*a</sup> Lixing Kang<sup>\*c</sup> and Qing Dai<sup>\*b</sup>

<sup>a</sup> Laboratory of Nanophotonic Materials and Devices, Laboratory of Standardization and Measurement for Nanotechnology, National Centre for Nanoscience and Technology, Beijing 100190, China. E-mail: hudb@nanoctr.cn

<sup>b</sup> School of Materials Science and Engineering, Shanghai Jiao Tong University, Shanghai, China. E-mail: daiqing@sjtu.edu.cn

<sup>c</sup> Division of Advanced Materials, Suzhou Institute of Nano-Tech and Nano-Bionics, Chinese Academy of Sciences, Suzhou 215123, China. E-mail: lxkang2013@sinano.ac.cn

<sup>d</sup> Suzhou Laboratory, Suzhou, 215100, China.

**Table S1. Interlayer binding energy of representative 2D materials**

| Materials                                | Interlayer binding energy (meV·Å <sup>-2</sup> ) | Interaction strength     | Structure                                                                            | References |  |
|------------------------------------------|--------------------------------------------------|--------------------------|--------------------------------------------------------------------------------------|------------|--|
| Graphene                                 | 22.5                                             | weak vdW interaction     | 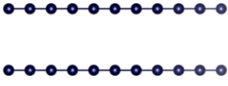   | 1          |  |
| <i>h</i> BN                              | 25.0                                             |                          |    | 1          |  |
| WSe <sub>2</sub>                         | 25.6                                             |                          |    | 1          |  |
| WS <sub>2</sub>                          | 26.1                                             |                          |    | 1          |  |
| MoS <sub>2</sub>                         | 26.3                                             |                          |  | 1          |  |
| CrSBr                                    | 27.17                                            |                          |  | 2          |  |
| V <sub>2</sub> O <sub>5</sub>            | 28.8                                             |                          |  | 2          |  |
| CaSO <sub>4</sub> ·2H <sub>2</sub> O     | 28.4                                             | weak non-vdW interaction |  | 2          |  |
| β-Ga <sub>2</sub> O <sub>3</sub> -(100)B | 30.58                                            |                          |  | 3          |  |
| P (black)                                | 33.4                                             | strong vdW interaction   |  | 1          |  |
| SnS                                      | 36.5                                             | strong vdW interaction   |  | 1          |  |

**Table S2. Classification of non-vdW layered cleavable materials and typical representatives**

| Major Category                                                   | Subclass Name                                 | Structural Feature                                                                                               | Dominant Interlayer Interaction                                            | Typical Representatives                                                               | References   |
|------------------------------------------------------------------|-----------------------------------------------|------------------------------------------------------------------------------------------------------------------|----------------------------------------------------------------------------|---------------------------------------------------------------------------------------|--------------|
| <b>Ionic Bond-Dominated Type (Most abundant in nature)</b>       | Charge-Compensating Cation Group              | Negatively charged covalent-ionic framework layers + interlayer large-radius cations                             | Ionic bonds between cations and framework oxygen atoms                     | Mica, KBBF ( $\text{KBe}_2\text{BO}_3\text{F}_2$ )                                    | 4<br>5       |
|                                                                  | Charge-Compensating Anion Group (LDHs Family) | Positively charged metal hydroxide layers + interlayer exchangeable anions                                       | Long-range electrostatic attraction between charged layers and counterions | Hydrotalcite                                                                          | 4            |
| <b>Hydrogen Bond-Dominated Type</b>                              | Crystalline WaterMediated Hydrogen Bond Group | Strong ionic bond framework layers + interlayer crystalline water molecule layers                                | Hydrogen bonds between water molecules and framework                       | Gypsum ( $\text{CaSO}_4 \cdot 2\text{H}_2\text{O}$ )                                  | 6            |
|                                                                  | Hydroxyl-Mediated Hydrogen Bond Group         | Framework surface hydroxyl groups directly bond to oxygen atoms of adjacent layers                               | Hydroxyl-oxygen hydrogen bonds                                             | Lepidocrocite ( $\gamma\text{-FeO(OH)}$ ), Atacamite ( $\text{Cu}_2\text{Cl(OH)}_3$ ) | 4            |
| <b>Weak Metallic Bond-Dominated Type (Artificial Synthesize)</b> | MAX Phases (Ternary Carbides / Nitrides)      | General formula $\text{M}_{n+1}\text{AX}_n$ , strong M-X covalent bond layers + weak M-A metallic bond layers    | Weak M-A metallic bonds                                                    | $\text{Ti}_3\text{AlC}_2$ , $\text{Ti}_2\text{AlC}$ , $\text{Nb}_4\text{AlC}_3$       | 7            |
|                                                                  | MAB Phases (Ternary Borides)                  | General formula $\text{M}_{n+1}\text{AB}_{2n}$ , strong M-B covalent bond layers + weak M-A metallic bond layers | Weak M-A metallic bonds                                                    | $\text{Ti}_2\text{InB}_2$ , $\text{Zr}_2\text{SB}_2$ , $\text{Hf}_2\text{PB}_2$       | 8            |
| <b>Weak Covalent Bond-Dominated Type</b>                         | Semiconductor / Transition Metal Oxides       | Stacking of independent metal oxygen polyhedron 2D layers                                                        | Weak covalent bonds + partial ionic bonds                                  | $\gamma\text{-WO}_3$ , $\text{SnO}$ , $\beta\text{-Ga}_2\text{O}_3$                   | 9<br>10<br>3 |
|                                                                  | Other Emerging Layered Materials              | Diverse layered framework structures                                                                             | Weak covalent bonds / weak metallic bonds                                  | $\text{Bi}_2\text{O}_2\text{Se}$ , $\text{MgB}_2$ , $\text{KV}_3\text{Sb}_5$          | 10           |

**Table S3. Comparison of key polariton performance metrics for  $\beta$ -Ga<sub>2</sub>O<sub>3</sub> and other representative polaritonic platforms**

| Material                                            | Crystal orientation | Polaritons type             | Frequency range (cm <sup>-1</sup> ) | Thickness (nm) | Re( $k_p/k_0$ )          | $Q$  | Ref.      |
|-----------------------------------------------------|---------------------|-----------------------------|-------------------------------------|----------------|--------------------------|------|-----------|
| $\beta$ -Ga <sub>2</sub> O <sub>3</sub> (this work) | (100)               | elliptic / hyperbolic       | 600-780                             | 115            | 22.7 [010]               | ~3-6 | This work |
| $\alpha$ -MoO <sub>3</sub>                          | (010)               | elliptic / hyperbolic       | 820-1010                            | 250            | 11.7 [100]<br>9.3 [001]  | >6   | 11        |
| hBN                                                 | (001)               | isotropic                   | 1360-1610                           | 20             | 13.5                     | >6   | 12        |
| $\alpha$ -V <sub>2</sub> O <sub>5</sub>             | (010)               | elliptic / hyperbolic       | 750-1050                            | 105            | 10.7 [100]<br>12.2 [001] | 3.5  | 13        |
| Gypsum (CaSO <sub>4</sub> ·2H <sub>2</sub> O)       | (010)               | elliptic / hyperbolic shear | 1110-1209                           | 75             | 25 [100]<br>10 [001]     | –    | 6         |

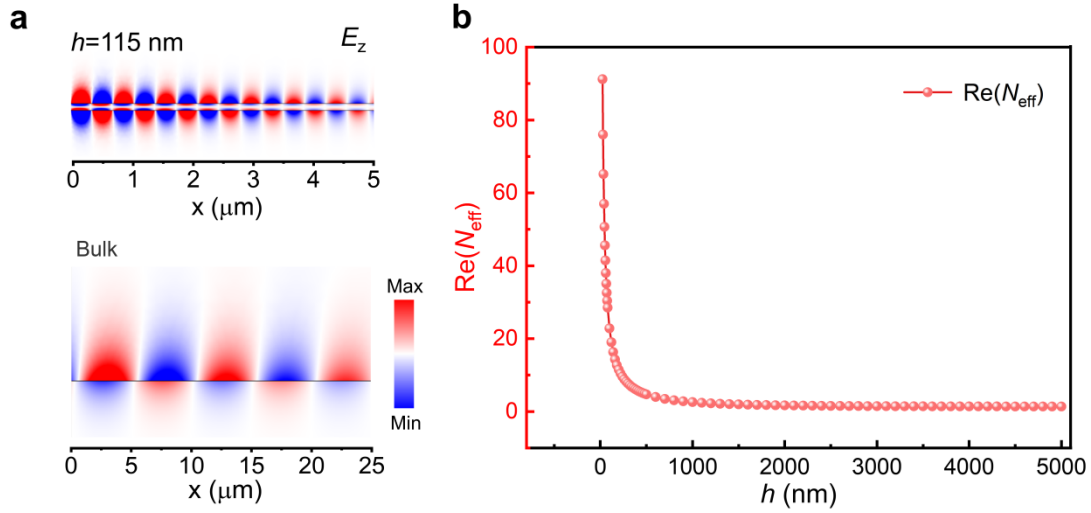

**Fig. S1 Dimensional reduction induces extreme field confinement of polaritons.** (a) Cross-sectional mode profile of phonon polaritons, the out-of-plane component of the optical field  $E_z$  is shown. Up: volume-confined mode within nanoflake. Down: surface mode within bulk crystal. (b) Field compression factor of the polariton mode at 715 cm<sup>-1</sup> against increasing thickness of  $\beta$ -Ga<sub>2</sub>O<sub>3</sub>.

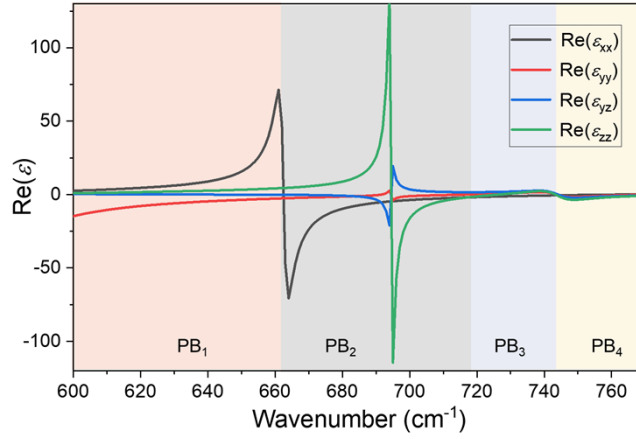

**Fig. S2 Dielectric properties of (100)-oriented  $\beta$ -Ga<sub>2</sub>O<sub>3</sub>.** Frequency-dependent real parts of the dielectric tensor components ( $\text{Re}(\epsilon_{xx})$ ,  $\text{Re}(\epsilon_{yy})$ ,  $\text{Re}(\epsilon_{yz})$ , and  $\text{Re}(\epsilon_{zz})$  for (100) plane as  $xy$ -plane.

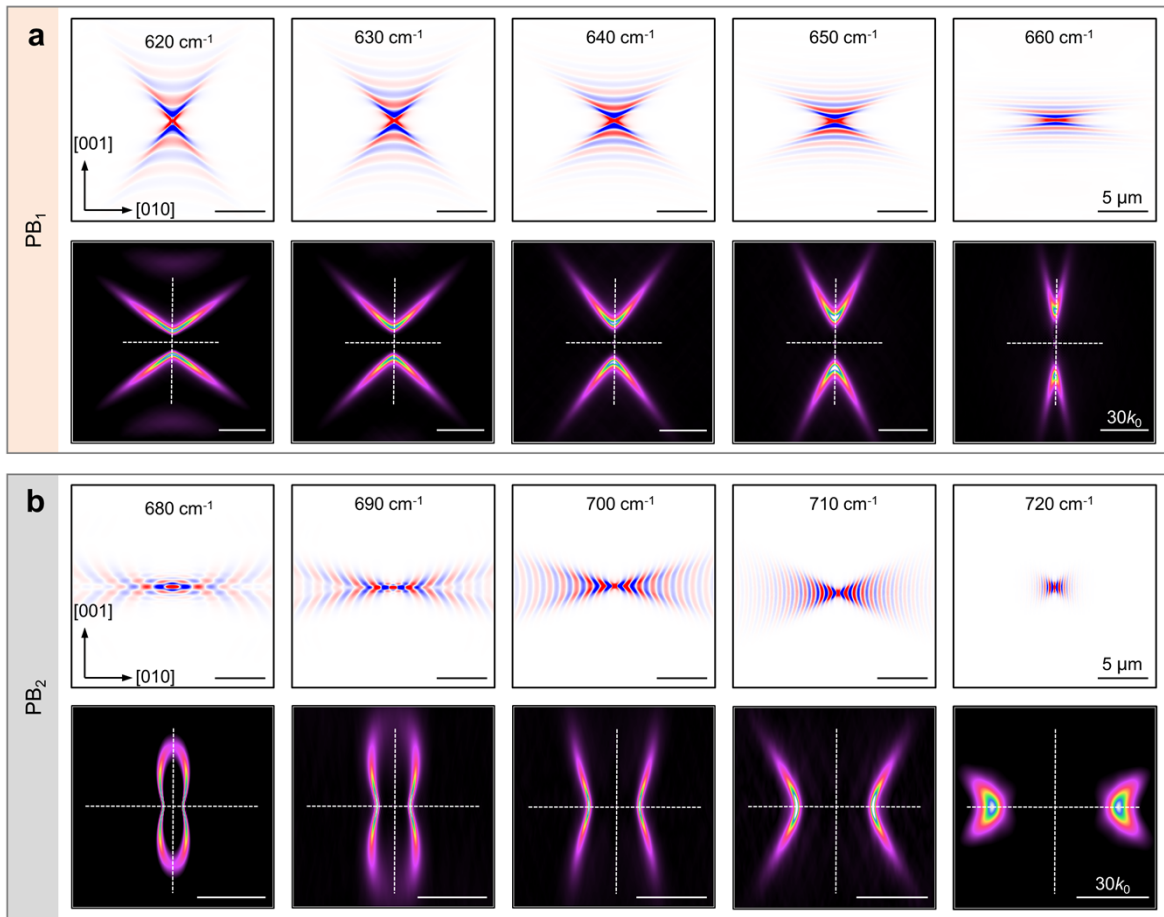

**Fig. S3 Frequency-dependent hyperbolic polaritons in a suspended (100)-oriented  $\beta$ -Ga<sub>2</sub>O<sub>3</sub> nanoflake across two different polariton bands.** Near-field patterns (top) and corresponding Fourier-transformed isofrequency contours (IFCs, bottom) across two Reststrahlen bands show frequency-switchable hyperbolic polaritons: (a) In PB<sub>1</sub> (620–

663  $\text{cm}^{-1}$ ), polaritons propagate along the [001] axis. (b) In  $\text{PB}_2$  (680–716  $\text{cm}^{-1}$ ), polaritons propagate along the [010] axis.

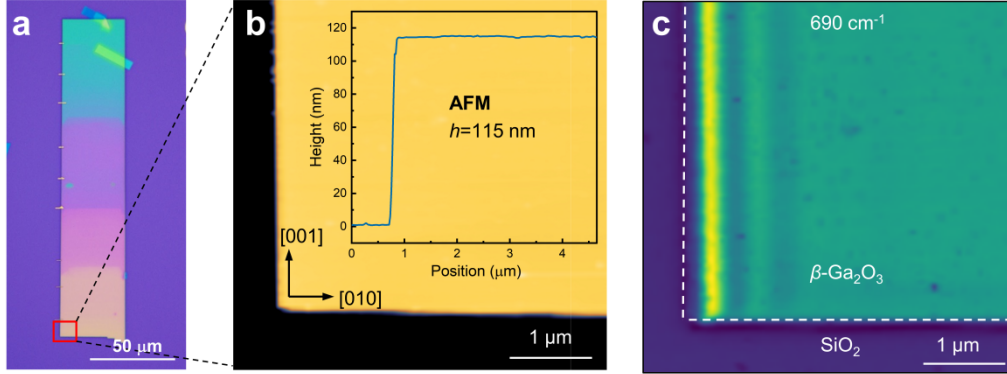

**Fig. S4 CVD-grown (100)-oriented  $\beta\text{-Ga}_2\text{O}_3$  nanoflakes with anisotropic polaritons.** (a) Optical image of a rectangular nanoflake. Orthogonal edges align with crystal axes: short edge  $\parallel$  [010], long edge  $\parallel$  [001]. (b) AFM topography of the region boxed in (a), with height profile (insert) confirming uniform thickness ( $h = 115$  nm). (c) Near-field optical image at 680  $\text{cm}^{-1}$  showing polaritonic fringes parallel to [010], signature of hyperbolic confinement in  $\text{PB}_2$ .

The propagation wavevector (real part  $k'$ ) and attenuation coefficient (imaginary part  $k''$ ) of the polaritons are obtained by analyzing the oscillatory decay of the near-field amplitude ( $S_2$ ) as a function of the tip-to-source distance  $x$  (Fig. 5a). The spatial profile is fitted using a custom MATLAB script based on a one-dimensional damped oscillation model with a power-law prefactor:

$$S_2(x) = A \cdot e^{-k''x} \cdot \frac{\cos(k'x + \varphi)}{x^\beta} + C$$

where  $A$  is the amplitude,  $\varphi$  is a phase offset,  $C$  is a constant background, and  $\beta$  is a power-law exponent that accounts for additional distance-dependent decay mechanisms. The propagation wavevector  $k'$  corresponds directly to the oscillation frequency, while the attenuation coefficient  $k''$  quantifies the exponential decay rate of the polariton energy.

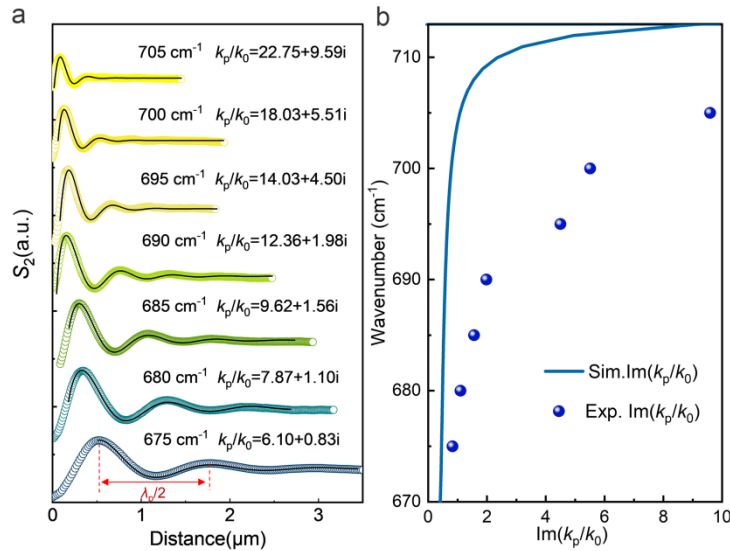

**Fig. S5** (a) Line profiles of polaritonic interference fringes propagating along the [010] direction at different frequencies, as a function of the distance from the flake edge.  $\lambda_p/2$ : the polaritons excited by the tip propagate away and are back-reflected at the flake edges, giving rise to interference fringes. (b) Imaginary part of the polariton wavevector extracted from near-field fringe fitting (blue symbols) compared with the theoretical calculation (blue line). The dielectric function used in the calculation follows Refs. [14] and [15].

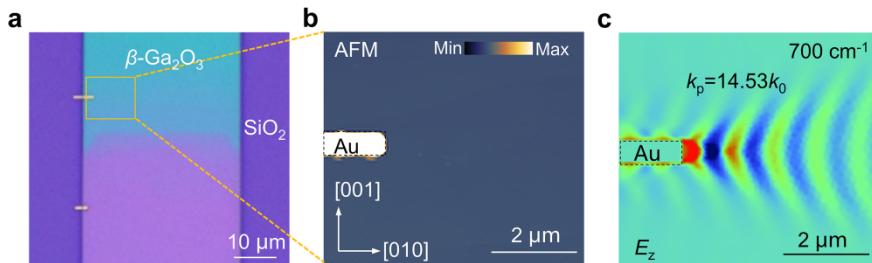

**Fig. S6** (a) Optical microscope image of the  $\beta\text{-Ga}_2\text{O}_3$  nanoflake shown in Fig. 3a. (b) Atomic force microscope image of the region marked by the orange box in (a). The flake thickness is 155 nm. Antenna dimensions: length, 1.5  $\mu\text{m}$ ; width, 500 nm; height, 100 nm. (c) Simulated polaritons launched by a gold antenna at 700  $\text{cm}^{-1}$ , displaying divergent wavefronts. The dielectric function used in the calculation follows Refs. [14] and [15].

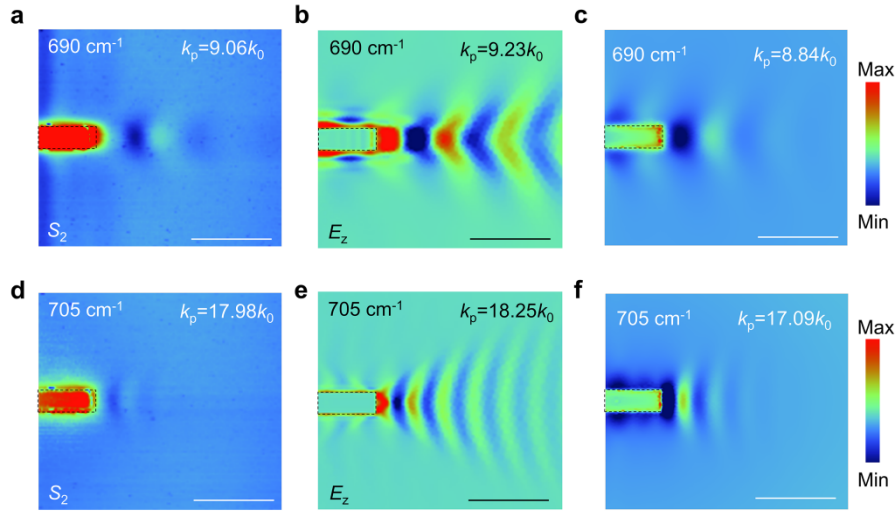

**Fig. S7 Frequency-dependent hyperbolic polaritons excited by gold nanorod on a (100)  $\beta$ - $\text{Ga}_2\text{O}_3$  nanoflake.** (a, d) Experimental near-field images (690 and 705  $\text{cm}^{-1}$ ) of gold-antenna-excited polaritons showing divergent wavefronts. (b, e) Simulated polariton patterns, using the standard dielectric function.<sup>14, 15</sup> (c, f) Simulated polariton patterns with the imaginary parts of the in-plane dielectric components ( $\epsilon_{xx}$  and  $\epsilon_{yy}$ ) increased by a factor of six. Scale bar: 2  $\mu\text{m}$ .

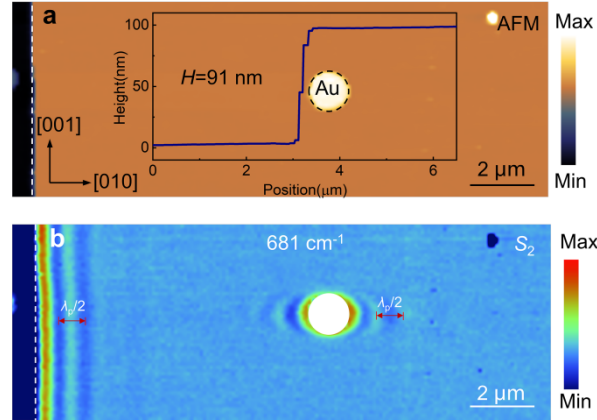

**Fig. S8 Real-space focusing of polaritons by a gold disk on a 91 nm-thick  $\beta$ - $\text{Ga}_2\text{O}_3$  nanoflake.** (a) AFM topography of the gold disk (radius: 650 nm; height: 60 nm) on the flake. (b) Experimental near-field image at 681  $\text{cm}^{-1}$ , showing the focusing of polaritons by the disk.

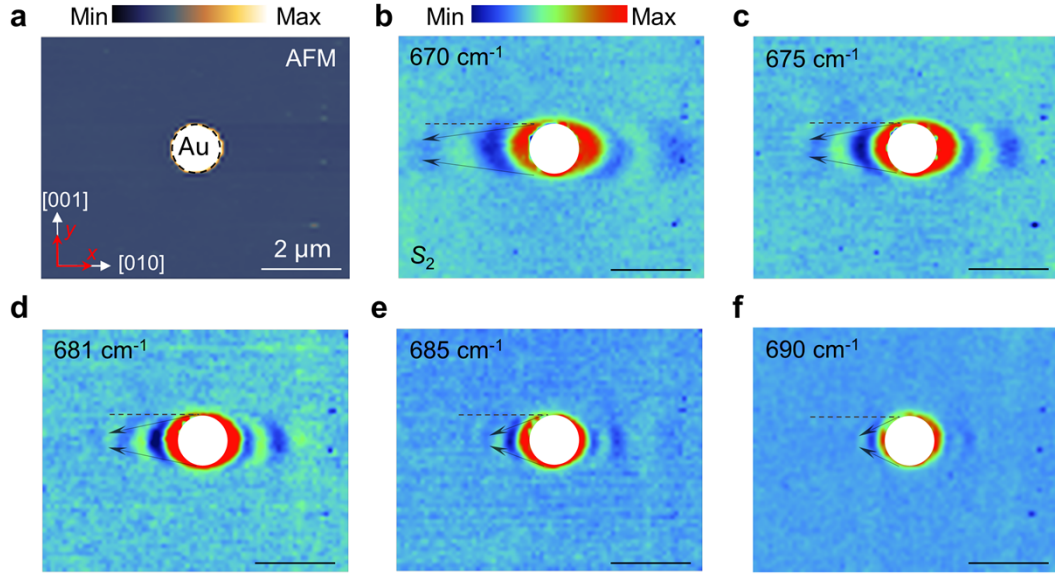

**Fig. S9 Frequency-dependent focusing of phonon polaritons by a gold disk on a 91-nm-thick  $\beta$ -Ga<sub>2</sub>O<sub>3</sub> nanoflake.** (a) AFM topography of the gold disk. (b–f) Experimental near-field images showing polariton focusing by the gold disk at frequencies from 670 to 690  $\text{cm}^{-1}$ .

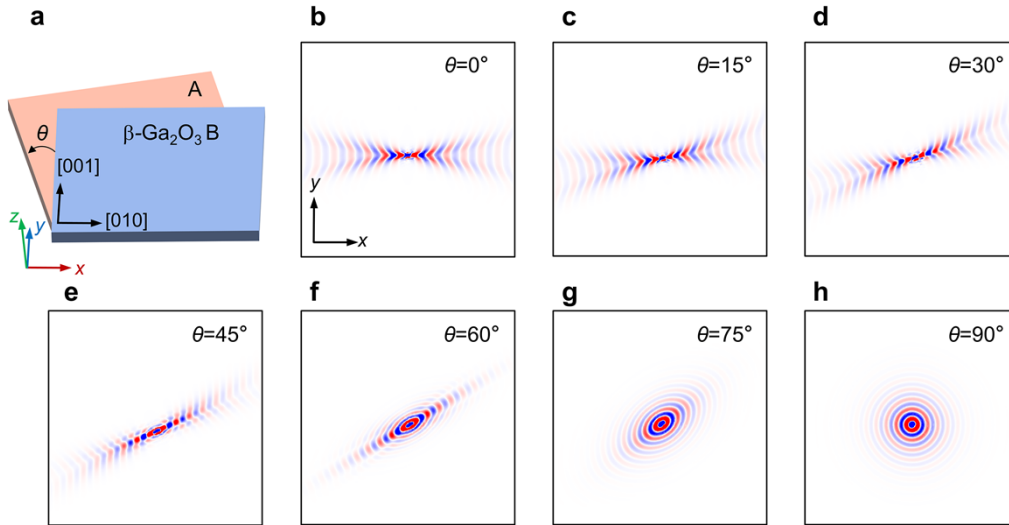

**Fig. S10 Rotation-induced topological transition of phonon polaritons.** (a) Schematic of twisted bilayer  $\beta$ -Ga<sub>2</sub>O<sub>3</sub>. Both the top layer ( $\beta$ -Ga<sub>2</sub>O<sub>3</sub> B) and bottom layer ( $\beta$ -Ga<sub>2</sub>O<sub>3</sub> A) are 60 nm thick. The  $x$  and  $y$  axes are aligned with the [010] and [001] crystallographic directions of the top layer ( $\beta$ -Ga<sub>2</sub>O<sub>3</sub> B). The twist angle ( $\theta$ ) is defined as the counterclockwise rotation of the bottom layer ( $\beta$ -Ga<sub>2</sub>O<sub>3</sub> A) relative to the top layer ( $\beta$ -Ga<sub>2</sub>O<sub>3</sub> B). (b–h) Numerical simulations of the out-of-plane electric field component ( $E_z$ ) distributions at 680  $\text{cm}^{-1}$ , illustrating the phonon polariton topology evolution with twist angle. The bilayer's dispersion relation transitions from hyperbolic ( $\theta = 15^\circ$  to  $45^\circ$ ) to elliptical ( $\theta = 75^\circ$ ) and finally to isotropic ( $\theta = 90^\circ$ ).

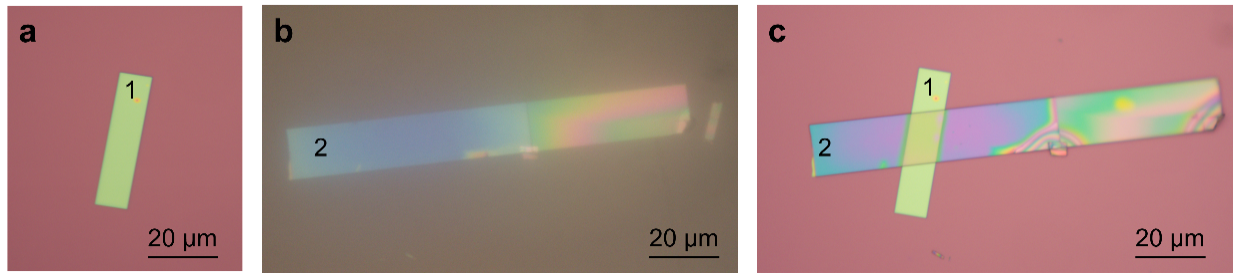

**Fig. S11 Deterministic assembly of  $\beta$ -Ga<sub>2</sub>O<sub>3</sub> bilayers via dry transfer method.** (a) Bottom-layer  $\beta$ -Ga<sub>2</sub>O<sub>3</sub> nanoflake on SiO<sub>2</sub>/Si substrate. (b) Top-layer  $\beta$ -Ga<sub>2</sub>O<sub>3</sub> nanoflake on PDMS substrate. (c) Stacked bilayer with controlled twist angle.

## References

- [1] Huang, Y., Pan, Y. H., Yang, R. et al. Universal mechanical exfoliation of large-area 2D crystals. *Nat. Commun.* 2020, 11 (1), 2453.
- [2] [Mounet, N., Gibertini, M., Schwaller, P. et al. Two-dimensional materials from high-throughput computational exfoliation of experimentally known compounds. *Nat. Nanotechnol.* 2018, 13, 246.
- [3] [Barman, S. K., Huda, M. N. Mechanism behind the easy exfoliation of Ga<sub>2</sub>O<sub>3</sub> ultra-thin film along (100) surface. *Phys. Status Solidi RRL* 2019, 13, 1800554.
- [4] Balan, A., Puthirath, A., Roy, S. et al. Non-van der Waals quasi-2D materials: recent advances in synthesis, emergent properties and applications. *Mater. Today* 2022, 58, 164.
- [5] Xu, Y., Liu, K., Peng, G. et al. High- $\kappa$  KBe<sub>2</sub>BO<sub>3</sub>F<sub>2</sub> dielectric material with wide bandgap for two-dimensional electronics. *Nat. Commun.* 2026.
- [6] Díaz-Núñez, P., Lanza, C., Wang, Z. et al. Visualization of topological shear polaritons in gypsum thin films. *Sci. Adv.* 2025, 11 (29), eadw3452.
- [7] Alam, M. S., Chowdhury, M. A., Kowser, M. A. et al. Advances of MAX phases: synthesis, characterizations and challenges. *Eng. Rep.* 2024, 6 (8).
- [8] Khazaei, M., Wang, J., Estili, M. et al. Novel MAB phases and insights into their exfoliation into 2D MBenes. *Nanoscale* 2019, 11 (23), 11305-11314.
- [9] Yang, H., Sun, H., Li, Q. et al. Structural, electronic, optical and lattice dynamic properties of the different WO<sub>3</sub> phases: first-principle calculation. *Vacuum* 2019, 164, 411-420.
- [10] Jiang, K., Ji, J., Gong, W. et al. Mechanical cleavage of non-van der Waals structures towards two-dimensional crystals. *Nat. Synth.* 2023, 2, 58.W.

- [11] Ma, W., Alonso-González, P., Li, S. et al. In-plane anisotropic and ultra-low-loss polaritons in a natural van der Waals crystal. *Nature* 2018, 562, 557.
- [12] Dai, S., Fei, Z., Ma, Q. et al. Tunable phonon polaritons in atomically thin van der Waals crystals. *Science*, 2014, 343, 1125.
- [13] Taboada-Gutiérrez, J., Álvarez-Pérez, G., Duan, J. et al. Broad spectral tuning of ultra-low-loss polaritons in a van der Waals crystal by intercalation. *Nat. Mater.* 2020, 19, 964.
- [14] Schubert, M., Korlacki, R., Knight, S., et al. Anisotropy, phonon modes, and free charge carrier parameters in monoclinic  $\beta$ -gallium oxide single crystals. *Phys. Rev. B* 2016, 93, 125209.
- [15] Passler, N., Ni, X., Hu, G. et al. Hyperbolic shear polaritons in low-symmetry crystals. *Nature*, 2022, 602, 595-600.
